# Supplementary material for: Crystal phase engineering of Ru for simultaneous selective photocatalytic oxidations and H2 production
Source: Royal Society of Chemistry journal article supplement (doi:10.1039/d2nr06447b), 2023-01-01
Supplement: d2nr06447b1.pdf [file d2nr06447b1.pdf]

## Electronic Supplementary Information

### Crystal phase engineering of Ru for simultaneous selective photocatalytic oxidations and H<sub>2</sub> production

Michaël Gebruers,<sup>a, 1</sup> Chunhua Wang,<sup>b, 1</sup> Rafikul A. Saha,<sup>a</sup> Yangshan Xie,<sup>a</sup> Imran Aslam,<sup>a</sup> Li Sun,<sup>b</sup> Yuhe Liao,<sup>c</sup> Xuhui Yang,<sup>d</sup> Taoran Chen,<sup>d</sup> Min-Quan Yang,<sup>d</sup> Bo Weng<sup>a \*</sup> and Maarten B. J. Roeffaers<sup>a \*</sup>

<sup>a</sup> cMACS, Department of Microbial and Molecular Systems, KU Leuven, Celestijnenlaan 200F, 3001 Leuven, Belgium.

<sup>b</sup> Department of Chemistry, KU Leuven, Celestijnenlaan 200F, 3001 Leuven, Belgium

<sup>c</sup> Guangzhou Institute of Energy Conversion, Chinese Academy of Sciences, No. 2, Nengyuan, Road, Tianhe District, Guangzhou 510641, P.R. China.

<sup>d</sup> College of Environmental Science and Engineering, Fujian Key Laboratory of Pollution Control & Resource Reuse, Fujian Normal University, Fuzhou 350007, P.R. China

<sup>1</sup> These authors contributed equally to this work.

\* Corresponding author:

E-mail: bo.weng@kuleuven.be; maarten.roeffaers@kuleuven.be

## 1. Supplementary figures and tables

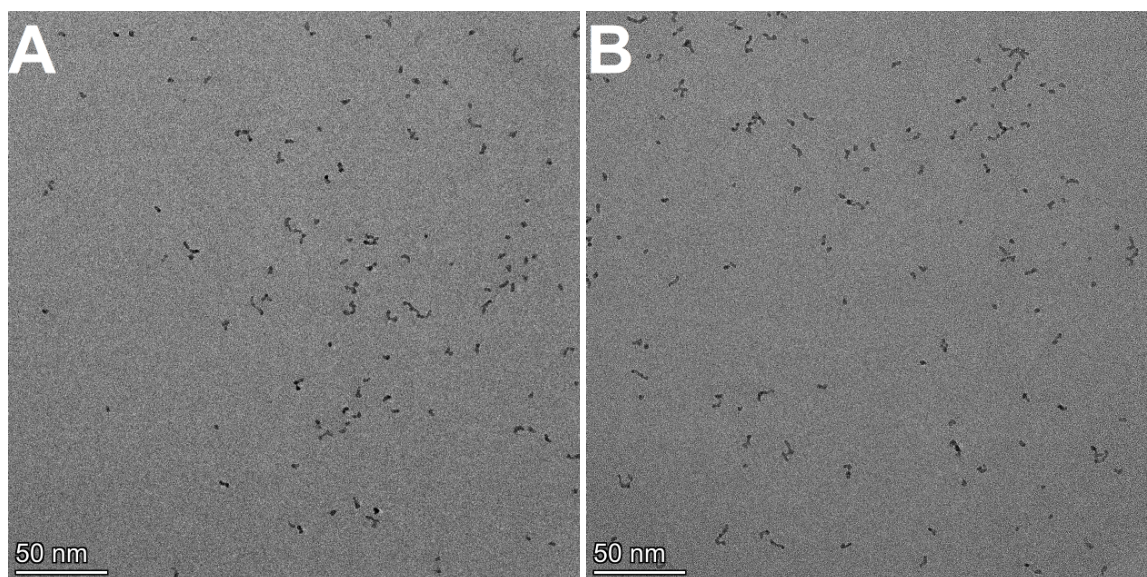

**Fig. S1** TEM images of (A) fcc Ru NPs and (B) hcp Ru NPs.

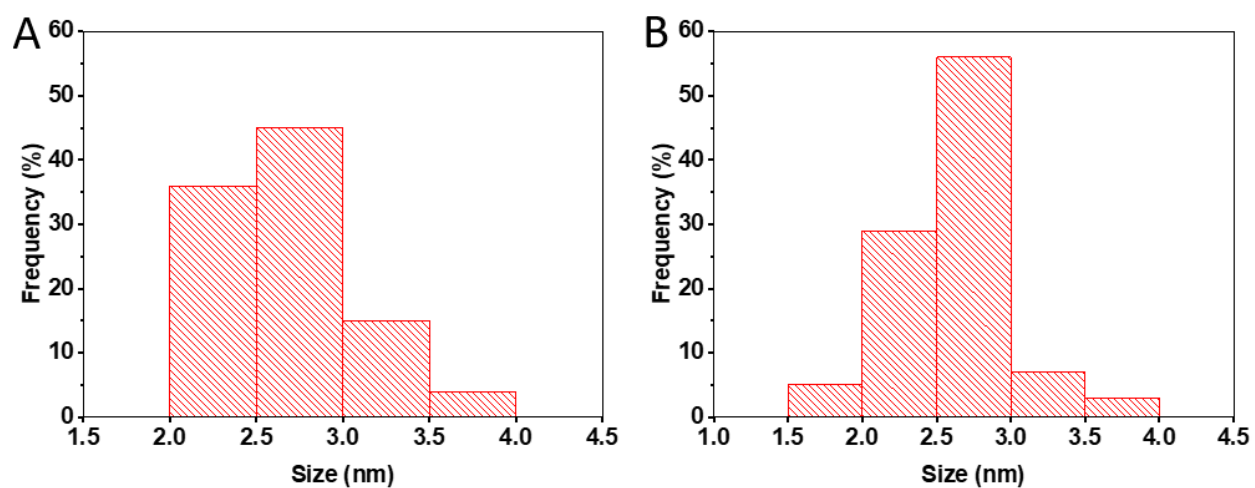

**Fig. S2** Histograms showing the particle size distribution of (A) fcc Ru NPs and (B) hcp Ru NPs. The particle size was determined by measuring TEM images using ImageJ (50 particles measured).

**Table S1** Amount of Ru loading of the Ru/TiO<sub>2</sub> composites determined via WDXRF.

| Sample                           | Wt% Ru        |
|----------------------------------|---------------|
| 0.15 wt% fcc-Ru/TiO <sub>2</sub> | 0.151 ± 0.014 |
| 0.30 wt% fcc-Ru/TiO <sub>2</sub> | 0.302 ± 0.027 |
| 0.60 wt% fcc-Ru/TiO <sub>2</sub> | 0.584 ± 0.038 |
| 0.90 wt% fcc-Ru/TiO <sub>2</sub> | 0.886 ± 0.068 |
| 1.20 wt% fcc-Ru/TiO <sub>2</sub> | 1.210 ± 0.029 |
| 0.60 wt% hcp-Ru/TiO <sub>2</sub> | 0.613 ± 0.012 |

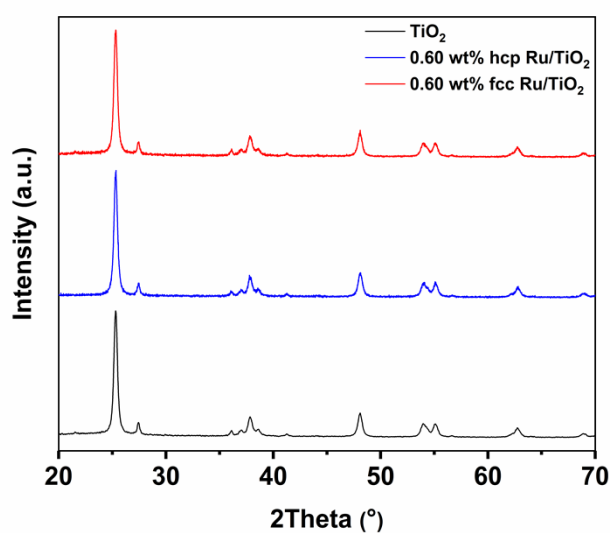

**Fig. S3** XRD patterns of TiO<sub>2</sub>, 0.60 wt% hcp Ru/TiO<sub>2</sub> and 0.60 wt% fcc Ru/TiO<sub>2</sub> composites.

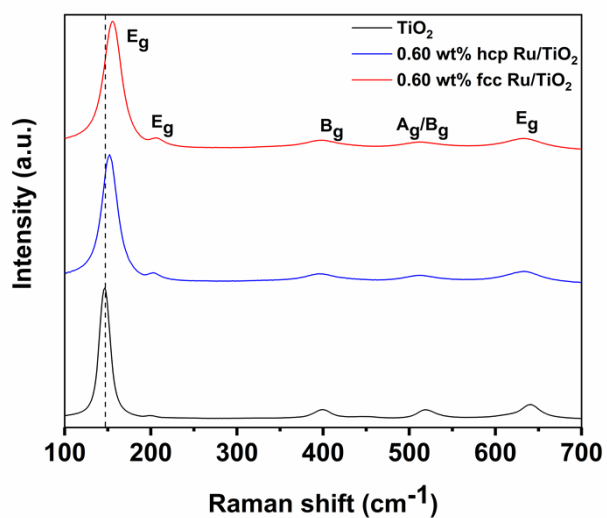

**Fig. S4** Raman spectra of  $\text{TiO}_2$ , 0.60 wt% hcp Ru/ $\text{TiO}_2$  and 0.60 wt% fcc Ru/ $\text{TiO}_2$  composites.

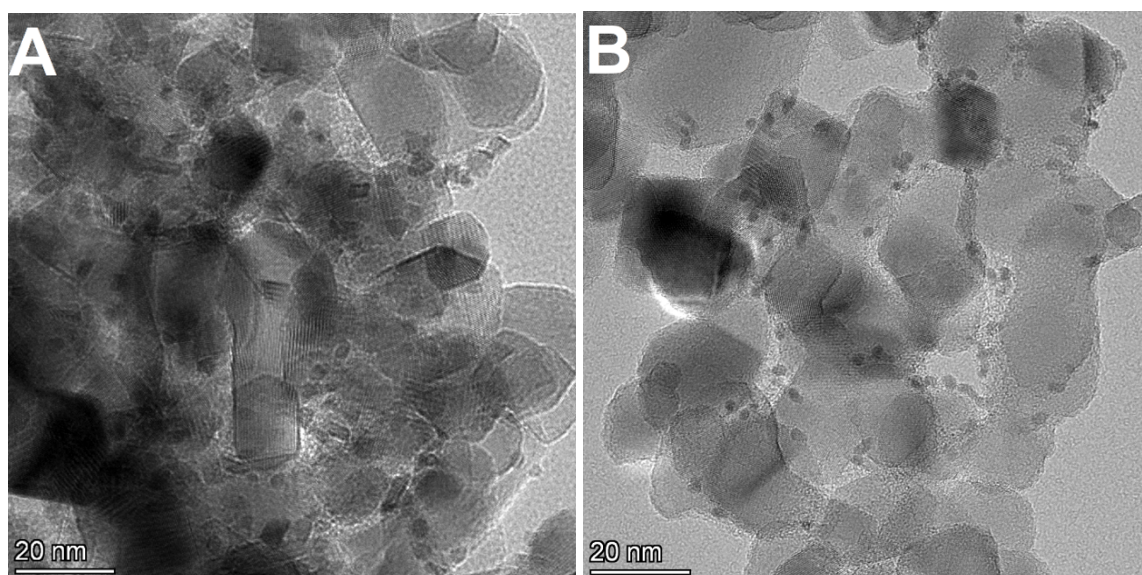

**Fig. S5** TEM images of (A) 0.60 wt% fcc Ru/ $\text{TiO}_2$  and (B) 0.60 wt% hcp Ru/ $\text{TiO}_2$ .

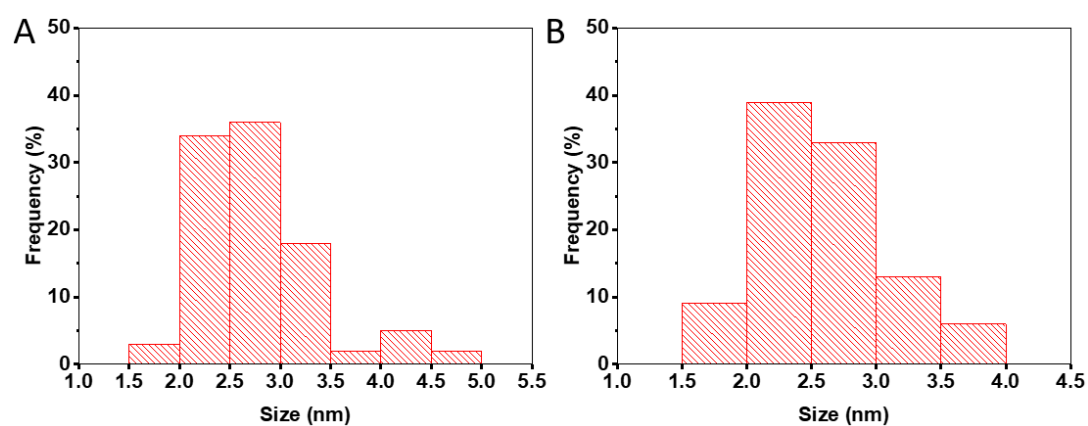

**Fig. S6** Histograms showing the particle size distribution of (A) fcc Ru NPs and (B) hcp Ru NPs. The particle size was determined by measuring TEM images using ImageJ (40 particles measured).

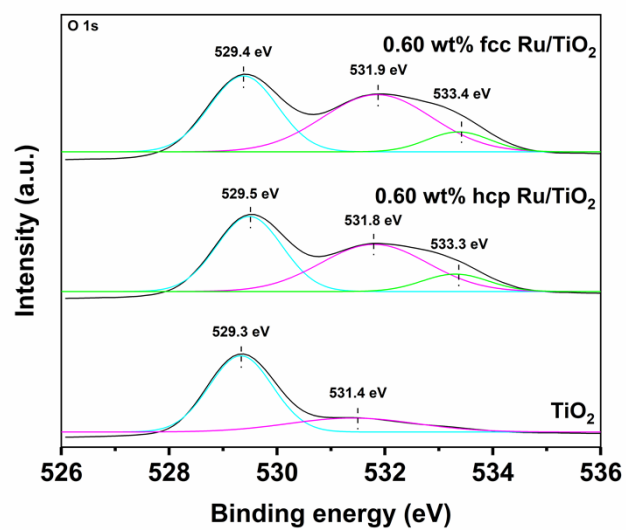

**Fig. S7** Typical high-resolution XPS spectra of the core levels of O1s in different samples.

**Note:** The peaks located at ca. 533.3eV may originated from the residual PVP in the Ru NPs.<sup>1</sup>

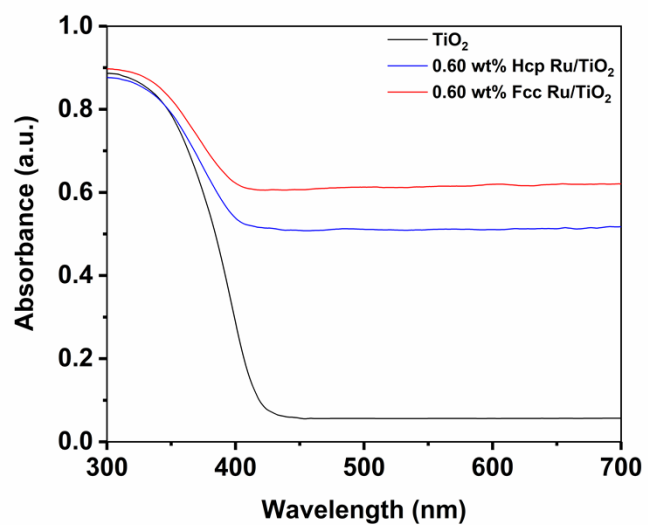

**Fig. S8** DRS spectra of the TiO<sub>2</sub> and different Ru/TiO<sub>2</sub> composites

### Calculation of the BAD and H<sub>2</sub> production rate

Calibration curves were generated for both BAD and H<sub>2</sub>, these were used to determine the production rates in the photocatalytic conversion of BA to BAD and H<sub>2</sub>. For the BAD calibration curve, a dilution series of BAD in trifluorotoluene with a total volume of 2.604 mL was prepared, which is the same volume as the total reaction volume and measured with gas chromatography (GC) (Shimadzu 2010 GC, CP-Sil 5, FID detector). This allows for the calibration curve to be used directly to calculate the amount of BAD formed in our catalysis experiments, without recalculating for the amount of solvent in the reaction. For H<sub>2</sub> various volumes of H<sub>2</sub> were injected directly in the GC (Shimadzu 2014 GC, molecular sieve 5A column, TCD detector) to generate the H<sub>2</sub> calibration curve.

This resulted in the following formulas to calculate the amount of product formed:

$$n_{BAD} (\mu\text{mol}) = \frac{\text{Signal (counts)} + 43685 (\text{counts})}{39309 (\text{counts } \mu\text{mol}^{-1})}$$

$$n_{H_2} (\mu\text{mol}) = \frac{\text{Signal (counts)} - 73 (\text{counts})}{5778 (\text{counts } \mu\text{mol}^{-1})}$$

The production rate of H<sub>2</sub> and BAD was then calculated as follows:

$$\text{Production rate } (\mu\text{mol g}^{-1} \text{ h}^{-1}) = \frac{n_{\text{product}} (\mu\text{mol})}{m_{\text{catalyst}} (\text{g}) * t_{\text{reaction}} (\text{h})}$$

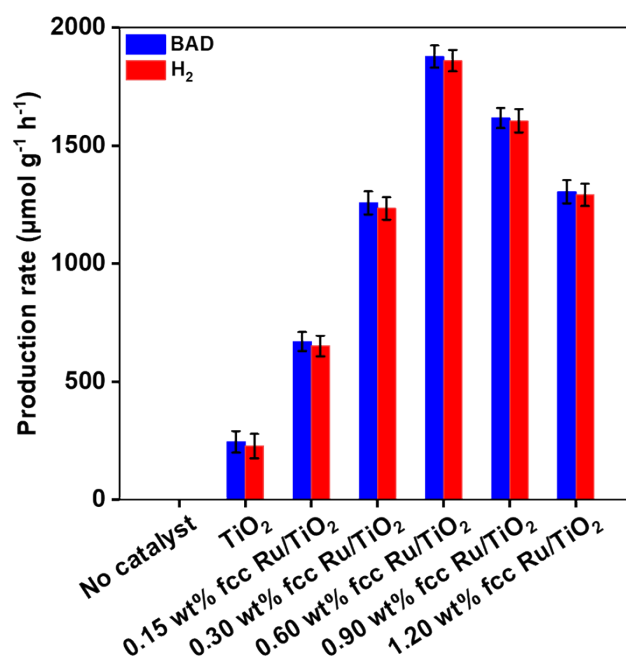

**Fig. S9** Catalytic performance of TiO<sub>2</sub> and fcc Ru/TiO<sub>2</sub> with different amounts of Ru loading in the simultaneous photocatalytic benzaldehyde (BAD) and hydrogen production from benzyl alcohol. Reaction conditions: 1.0 mmol of benzyl alcohol, 15 mg of catalyst, 2.5 mL of trifluorotoluene, under vacuum, simulated solar light (300 W Xe lamp, AM 1.5 G), reaction time of 14h.

**Table S2** Catalytic performance of TiO<sub>2</sub>, fcc Ru/TiO<sub>2</sub> with different amounts of Ru loading and 0.60 wt% hcp Ru/TiO<sub>2</sub> in the simultaneous photocatalytic benzaldehyde (BAD) and hydrogen production from benzyl alcohol.

| Catalyst                         | BAD production rate<br>( $\mu\text{mol g}^{-1} \text{h}^{-1}$ ) | Hydrogen production rate<br>( $\mu\text{mol g}^{-1} \text{h}^{-1}$ ) |
|----------------------------------|-----------------------------------------------------------------|----------------------------------------------------------------------|
| No catalyst                      | 0.0 $\pm$ 0.0                                                   | 0.0 $\pm$ 0.0                                                        |
| TiO <sub>2</sub>                 | 245.5 $\pm$ 45.7                                                | 227.5 $\pm$ 51.3                                                     |
| 0.15 wt% fcc Ru/TiO <sub>2</sub> | 670.1 $\pm$ 40.3                                                | 651.5 $\pm$ 44.0                                                     |
| 0.30 wt% fcc Ru/TiO <sub>2</sub> | 1257.6 $\pm$ 48.9                                               | 1234.0 $\pm$ 47.4                                                    |
| 0.60 wt% fcc Ru/TiO <sub>2</sub> | 1877.3 $\pm$ 46.5                                               | 1860.3 $\pm$ 45.2                                                    |
| 0.90 wt% fcc Ru/TiO <sub>2</sub> | 1617.0 $\pm$ 42.6                                               | 1605.5 $\pm$ 49.1                                                    |
| 1.20 wt% fcc Ru/TiO <sub>2</sub> | 1305.0 $\pm$ 49.1                                               | 1291.5 $\pm$ 47.0                                                    |
| 0.60 wt% hcp Ru/TiO <sub>2</sub> | 1007.2 $\pm$ 50.5                                               | 986.5 $\pm$ 53.7                                                     |

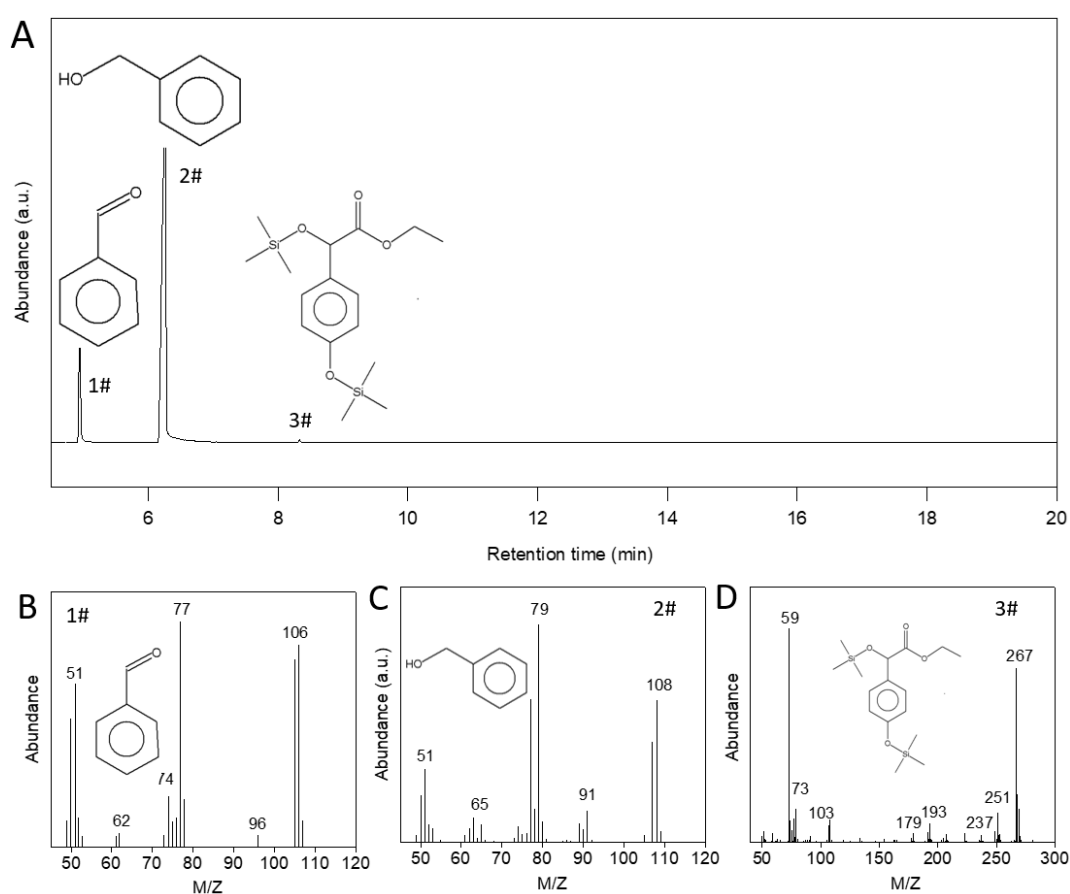

**Fig. S10** GC-MS analysis of the products of the simultaneous benzaldehyde (BAD) and H<sub>2</sub> production from benzyl alcohol over 0.60 wt% fcc Ru/TiO<sub>2</sub> composite. Reaction conditions: 1.0 mmol of benzyl alcohol, 15 mg of catalyst, 2.5 mL of trifluorotoluene, under vacuum, simulated solar light (300 W Xe lamp, AM 1.5 G), reaction time of 14h.

**Table S3** Recyclability of 0.60 wt% fcc Ru/TiO<sub>2</sub> in the simultaneous photocatalytic benzaldehyde (BAD) and hydrogen production from benzyl alcohol.

| Cycle | BAD production rate | Hydrogen production rate |
|-------|---------------------|--------------------------|
|-------|---------------------|--------------------------|

|   | ( $\mu\text{mol g}^{-1} \text{h}^{-1}$ ) | ( $\mu\text{mol g}^{-1} \text{h}^{-1}$ ) |
|---|------------------------------------------|------------------------------------------|
| 1 | $1885.2 \pm 54.8$                        | $1867.0 \pm 51.4$                        |
| 2 | $1839.6 \pm 53.3$                        | $1822.3 \pm 52.0$                        |
| 3 | $1876.4 \pm 46.9$                        | $1858.2 \pm 44.5$                        |
| 4 | $1890.6 \pm 45.5$                        | $1874.6 \pm 49.6$                        |
| 5 | $1860.3 \pm 47.3$                        | $1845.1 \pm 46.3$                        |

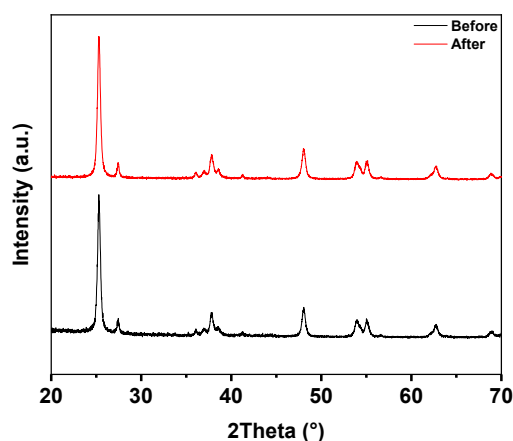

**Fig. S11** XRD patterns of the 0.60 wt% fcc Ru/TiO<sub>2</sub> composite before and after catalytic reactions. Reaction conditions: 1.0 mmol of benzyl alcohol, 15 mg of catalyst, 2.5 mL of trifluorotoluene, under vacuum, simulated solar light (300 W Xe lamp, AM 1.5 G), reaction time of 14h.

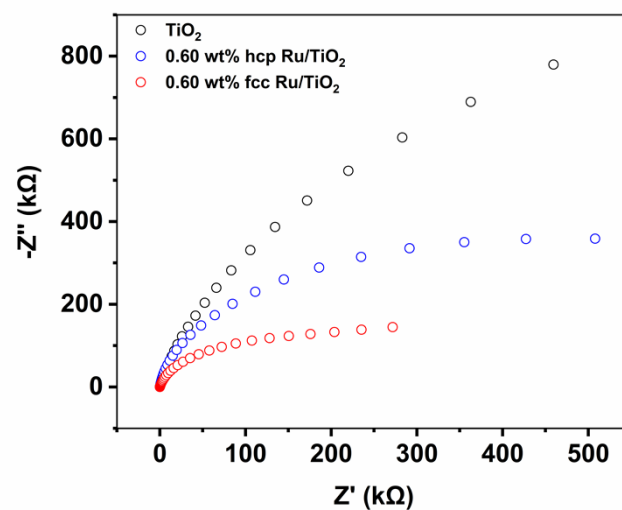

**Fig. S12** Electrochemical impedance spectroscopy (EIS) spectra of the TiO<sub>2</sub>, 0.60 wt% hcp Ru/TiO<sub>2</sub> and 0.60 wt% fcc Ru/TiO<sub>2</sub> composites.



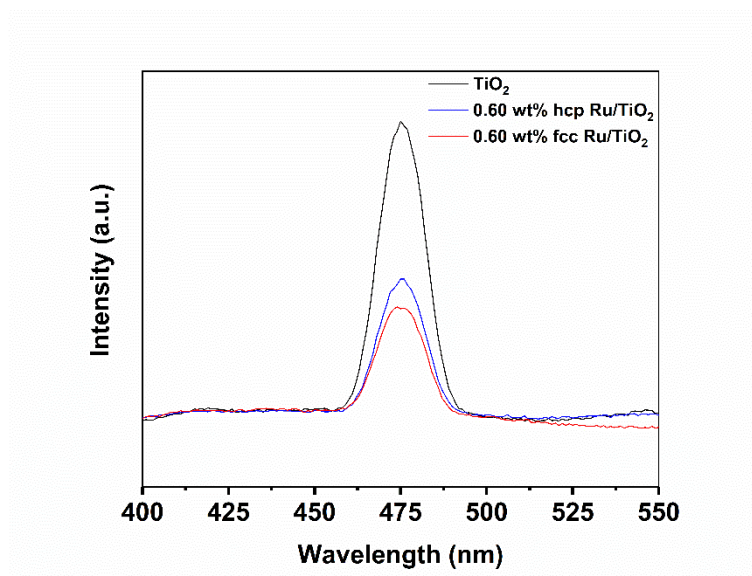

**Fig. S13** Steady-state PL spectra of the  $\text{TiO}_2$ , 0.60 wt% hcp Ru/ $\text{TiO}_2$  and 0.60 wt% fcc Ru/ $\text{TiO}_2$  composites.

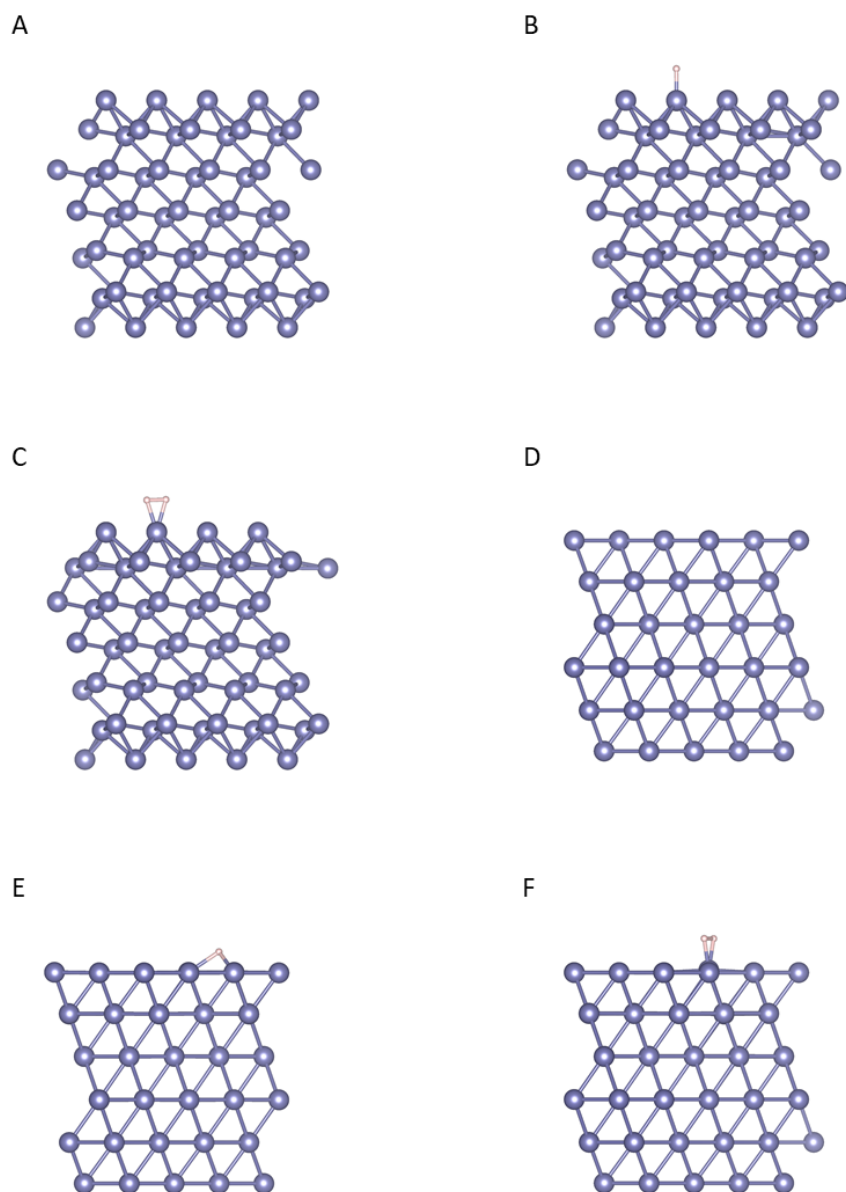

**Fig. S14** Optimized structures calculated via DFT of (A) H(101) planes, (B)  $\text{H}^+$  adsorbed on H(101) planes, (C)  $\text{H}_2$  adsorbed on H(101) planes, (D) F(111) planes, (E)  $\text{H}^+$  adsorbed on F(111) planes and (F)  $\text{H}_2$  adsorbed on F(111) planes.

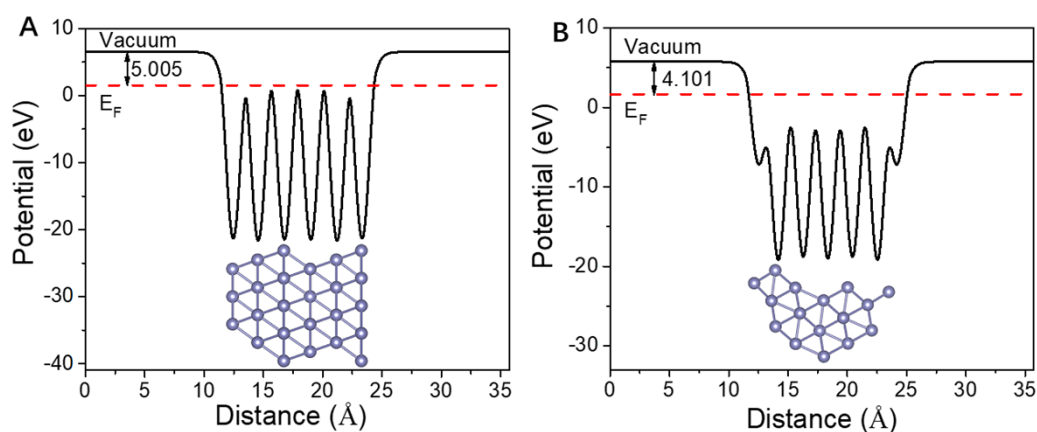

**Fig. S15** The calculated electrostatic potential of (A) Ru F(111) and (B) Ru H(101) planes.

**Table S4** Adsorption ability of  $H^+$  and  $H_2$  on the H(101) and F(111) planes of hcp and fcc Ru respectively, calculated via DFT.

| Crystal plane   | $H^+$ adsorption strength (eV) | $H_2$ adsorption strength (eV) |
|-----------------|--------------------------------|--------------------------------|
| Hcp Ru – H(101) | -0.404                         | -0.680                         |
| Fcc Ru – F(111) | -0.621                         | -0.448                         |

#### Calculation of Schottky barrier height:

The Schottky barrier height is calculated as follows:

$$\phi_b = \phi_{Ru} - X$$

In which  $\phi_b$  the Schottky barrier height,  $\phi_{Ru}$  is the work function of Ru and  $X$  the electron affinity of  $TiO_2$ . The work function ( $\phi_{Ru}$ ) of a surface model is usually obtained by calculating the electrostatic potential along the  $z$ -axis. It is defined as  $\phi_{Ru} = E_O - E_F$ , where  $E_O$  and  $E_F$  are the energy of vacuum level and the Fermi level, respectively. Therefore, the work functions of fcc and hcp Ru can be obtained from the DFT calculations as is shown in **Fig. S15**.

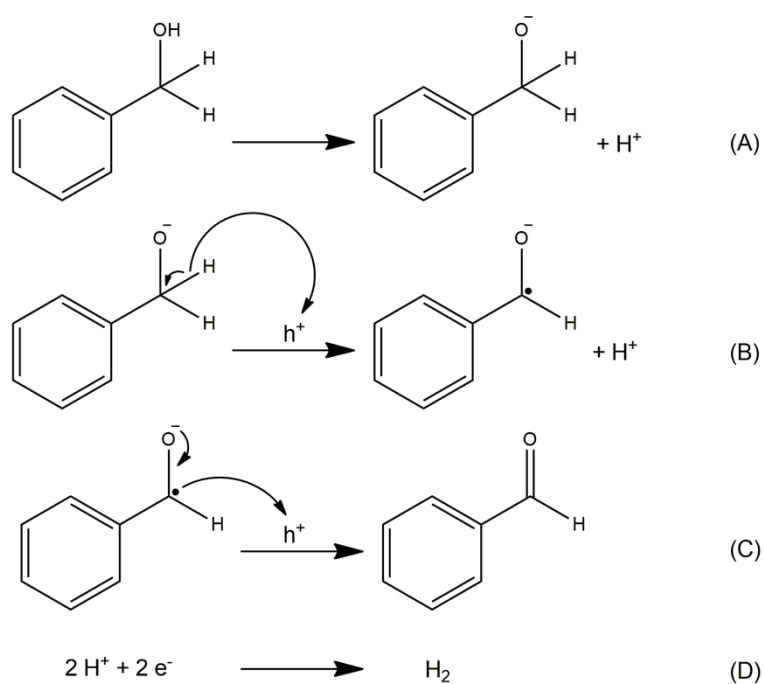

**Scheme S1** Reaction mechanism for the simultaneous photocatalytic benzaldehyde (BAD) (A–C) and hydrogen production (D) from benzyl alcohol over Ru/TiO<sub>2</sub> PCs.

**Table S5** Catalytic performance of the 0.60 wt% fcc Ru/TiO<sub>2</sub> composite in different reaction conditions.

| Different conditions | BAD production rate<br>( $\mu\text{mol g}^{-1} \text{h}^{-1}$ ) | Hydrogen production rate<br>( $\mu\text{mol g}^{-1} \text{h}^{-1}$ ) |
|----------------------|-----------------------------------------------------------------|----------------------------------------------------------------------|
| No light             | $0.0 \pm 0.0$                                                   | $0.0 \pm 0.0$                                                        |
| No catalyst          | $0.0 \pm 0.0$                                                   | $0.0 \pm 0.0$                                                        |

**Table S6** Catalytic performance of the 0.60 wt% fcc Ru/TiO<sub>2</sub> composite in the absence of scavengers, in the presence of potassium persulfate as an electron scavenger and in the presence of ammonium oxalate as a hole scavenger in the simultaneous photocatalytic benzaldehyde (BAD) and hydrogen production from benzyl alcohol.

| Scavenger            | BAD production rate<br>( $\mu\text{mol g}^{-1} \text{h}^{-1}$ ) | Hydrogen production rate<br>( $\mu\text{mol g}^{-1} \text{h}^{-1}$ ) |
|----------------------|-----------------------------------------------------------------|----------------------------------------------------------------------|
| No scavenger         | 1877.3 $\pm$ 46.5                                               | 1860.6 $\pm$ 45.2                                                    |
| Potassium persulfate | 1831.2 $\pm$ 42.0                                               | 421.7 $\pm$ 51.2                                                     |
| Ammonium oxalate     | 315.3 $\pm$ 39.5                                                | 237.8 $\pm$ 53.5                                                     |

### 3. References

- 1 S. Kang, R. C. Pawar, Y. Pyo, V. Khare and C. S. Lee, *J. Exp. Nanosci.*, 2016, **11**, 259–275.
